# Supplementary material
Source: Springer Nature journal article supplement (https://www.springermedizin.de/resource/supplementary/12903_2007_101_MOESM1_ESM.pdf/9517322)
Supplement: MOESM1 [file 9517322]

Articles identified using the search strategy:  
African-American 747,  
Chinese 731, Filipino 32,  
Hispanic 476

Articles excluded:

- Duplicates (identified more than once in the search)
- Could not be located in libraries
- Not relevant to the research questions

African-American 656 (90.2%),  
Chinese 600 (84.2%), Filipino 30  
(93.7%), Hispanic 405 (88.0%)

Articles retrieved and read in full:  
African-American 91  
Chinese 131, Filipino 2,  
Hispanic 71

Articles excluded:

- Epidemiologic accounts only
- Only Abstract available

African-American 77, Chinese 106,  
Filipino 0, Hispanic 59

Articles that met the inclusion criteria:  
African-American 14,  
Chinese 26, Filipino 2,  
Hispanic 12

Articles found from secondary search of bibliographies:

African-American 2, Chinese 4,  
Filipino 0, Hispanic 0

**Articles included in final review:**

African-American 16,  
Chinese 30, Filipino 2,  
Hispanic 12
